# Supplementary material for: Understanding sodium storage properties of ultra-small Fe3S4 nanoparticles – a combined XRD, PDF, XAS and electrokinetic study
Source: Royal Society of Chemistry journal article supplement (doi:10.1039/d1nr06950k), 2022-01-01
Supplement: d1nr06950k1.pdf [file d1nr06950k1.pdf]

## Electronic supplementary information

### **Understanding sodium storage properties of ultra-small Fe<sub>3</sub>S<sub>4</sub> nanoparticles – a combined XRD, PDF, XAS and electrokinetic study**

Felix Hartmann,<sup>\*a</sup> Martin Etter,<sup>b</sup> Giannantonio Cibir,<sup>c</sup> Hendrik Groß,<sup>d</sup> Lorenz Kienle<sup>d</sup> and  
Wolfgang Bensch<sup>\*a</sup>

<sup>a</sup>Institute of Inorganic Chemistry, Christian-Albrecht University of Kiel, Max-Eyth-Str. 2, 24118 Kiel,  
Germany, corresponding author mail: wbensch@ac.uni-kiel.de

<sup>b</sup>Deutsches Elektronen-Synchrotron (DESY), Notkestr. 85, 22607 Hamburg, Germany

<sup>c</sup>Diamond Light Source (DLS), Harwell Science and Innovation Campus, Didcot, Oxfordshire OX11  
0DE, United Kingdom

<sup>d</sup>Institute of Materials Science, Christian-Albrecht University of Kiel, Kaiserstr. 2, 24143 Kiel,  
Germany

**Table S1** Structural parameters for pristine Fe<sub>3</sub>S<sub>4</sub> from PDF and PXRD refinements.

| Parameter                              | XRD                                            | PDF                                             |
|----------------------------------------|------------------------------------------------|-------------------------------------------------|
| Space group                            | <i>Fd</i> $\bar{3}$ <i>m</i>                   | <i>Fd</i> $\bar{3}$ <i>m</i>                    |
| <i>a</i> / Å                           | 9.8567(4)                                      | 9.8520(2)                                       |
| Domain size                            | <i>D</i> <sub>vol</sub> = 9.9(1) <sup>a)</sup> | <i>D</i> <sub>sph</sub> = 10.2(1) <sup>b)</sup> |
| Fe1 (8 <i>a</i> )                      | 0.125, 0.125, 0.125                            | <i>x</i> = <i>y</i> = <i>z</i> = 0.125          |
| Fe2 (16 <i>d</i> )                     | 0.5, 0.5, 0.5                                  | <i>x</i> = <i>y</i> = <i>z</i> = 0.5            |
| S1 (32 <i>e</i> )                      | 0.2540(3), 0.2540(3), 0.2540(3)                | 0.2556(1), 0.2556(1), 0.2556(1)                 |
| DW <sup>c)</sup> (Fe) / Å <sup>2</sup> | 1.55(5)                                        | 1.37(1)                                         |
| DW <sup>c)</sup> (S) / Å <sup>2</sup>  | 1.77(7)                                        | 1.31(1)                                         |
| <i>R</i> <sub>wp</sub>                 | 3.81%                                          | 13.6%                                           |
| $\chi^2$                               | 2.58                                           | -                                               |

a) Volume weighted average domain size extracted from WPPM of PXRD pattern; b) Spherical domain size extracted from PDF; c) Debye Waller factor

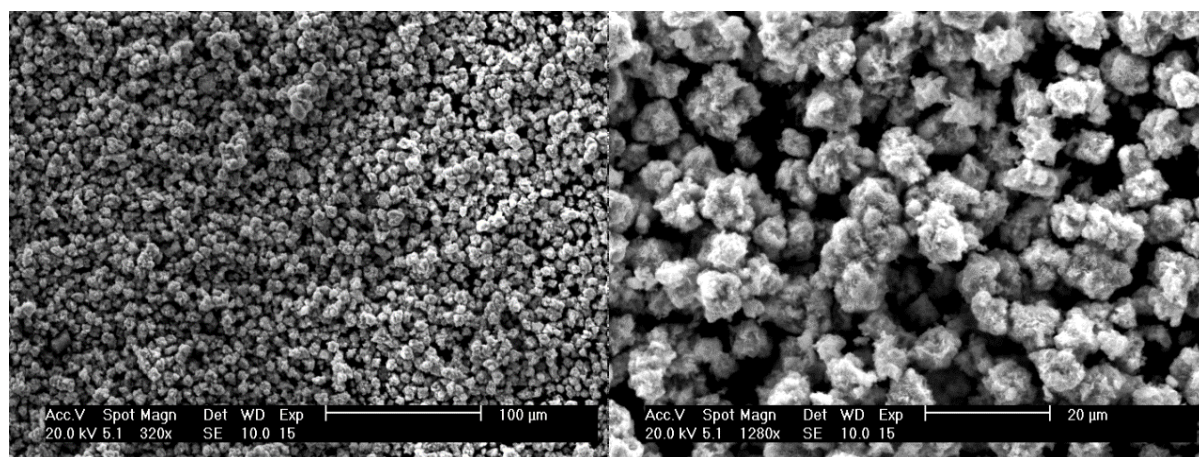**Fig. S1** SEM images of as-prepared Fe<sub>3</sub>S<sub>4</sub> particles.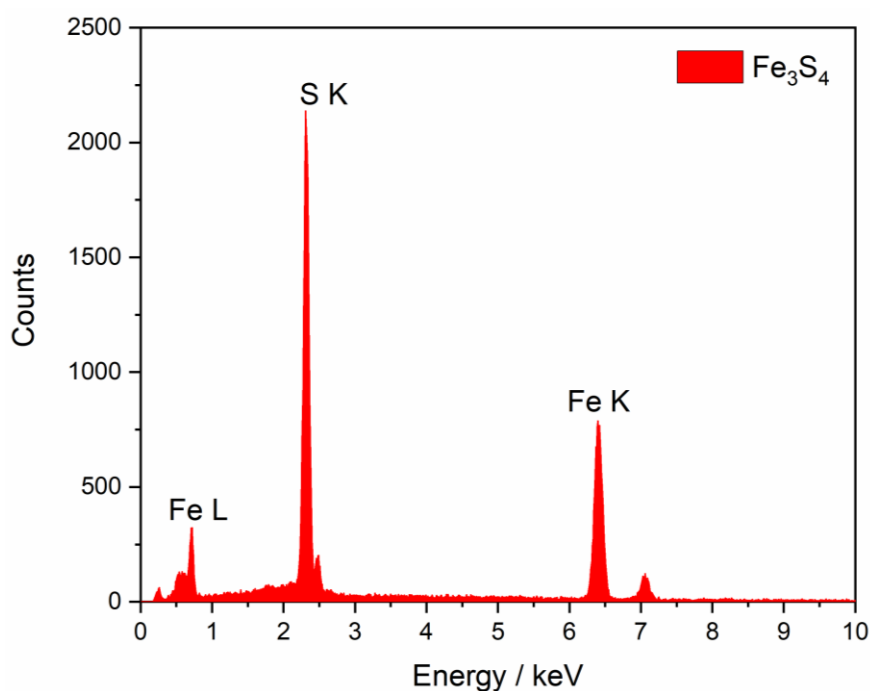**Fig. S2** EDX spectrum of as-prepared Fe<sub>3</sub>S<sub>4</sub>.

**Table S2** Results of SEM-EDX measurements of as-prepared material.

| spot                                       | Fe / at. % | S / at. %  | Stoichiometry                              |
|--------------------------------------------|------------|------------|--------------------------------------------|
| 1                                          | 41.9       | 58.1       | Fe <sub>2.93</sub> S <sub>4.07</sub>       |
| 2                                          | 42.1       | 57.9       | Fe <sub>2.95</sub> S <sub>4.05</sub>       |
| 3                                          | 41.9       | 58.1       | Fe <sub>2.93</sub> S <sub>4.07</sub>       |
| Average                                    | 42.0 ± 0.1 | 58.0 ± 0.1 | Fe <sub>2.94(1)</sub> S <sub>4.06(1)</sub> |
| Theoretical Fe <sub>3</sub> S <sub>4</sub> | 42.9       | 57.1       | Fe <sub>3.00</sub> S <sub>4.00</sub>       |

**Table S3** Results of elemental analysis of as-prepared material. Sulphanilamide was used as reference.

| measurement                                | N wt. % | C wt. % | H wt. % | S wt. % |
|--------------------------------------------|---------|---------|---------|---------|
| 1                                          | 0.39    | 3.00    | 0.43    | 40.47   |
| 2                                          | 0.49    | 3.07    | 0.43    | 40.64   |
| Average                                    | 0.44    | 3.03    | 0.43    | 40.55   |
| Theoretical Fe <sub>3</sub> S <sub>4</sub> | 0       | 0       | 0       | 43.36   |

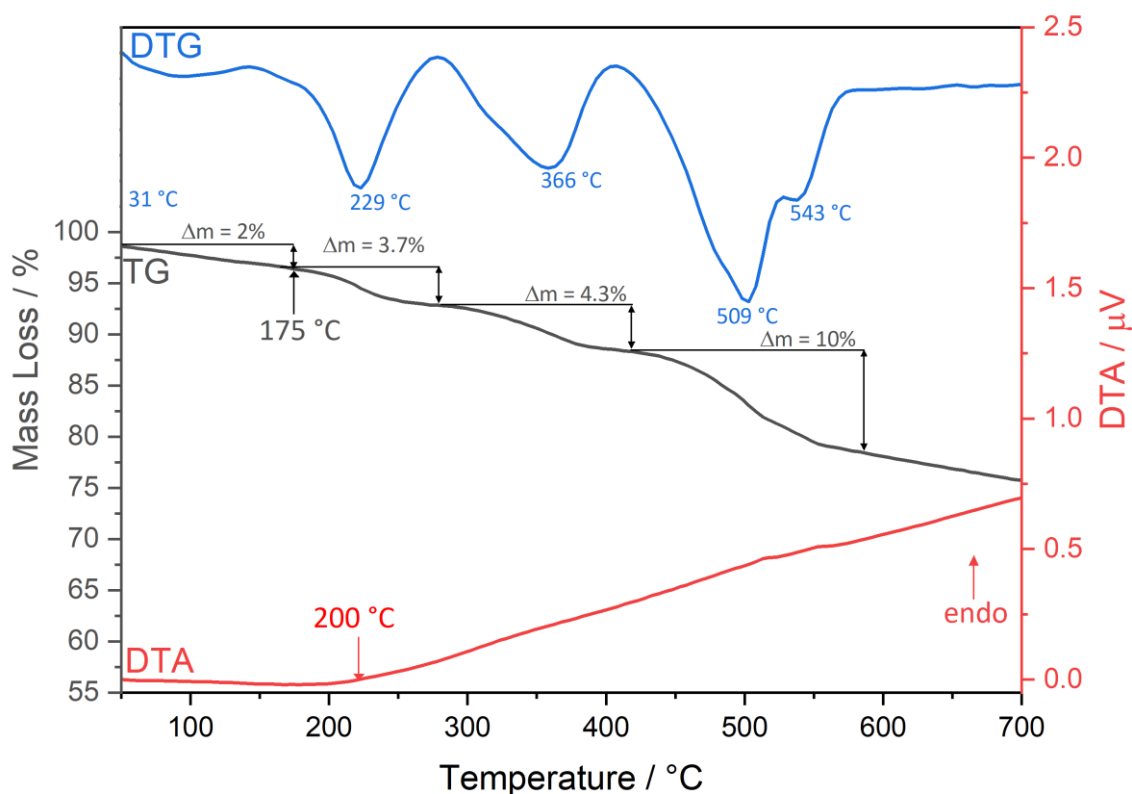**Fig. S3** Thermogravimetry (TG, black), differential thermal analysis (DTA, red) and derivative thermogravimetry (DTG, blue) of the product of solvothermal synthesis before annealing. The measurements were performed with a heating rate of 1 K min<sup>-1</sup> in N<sub>2</sub> atmosphere.

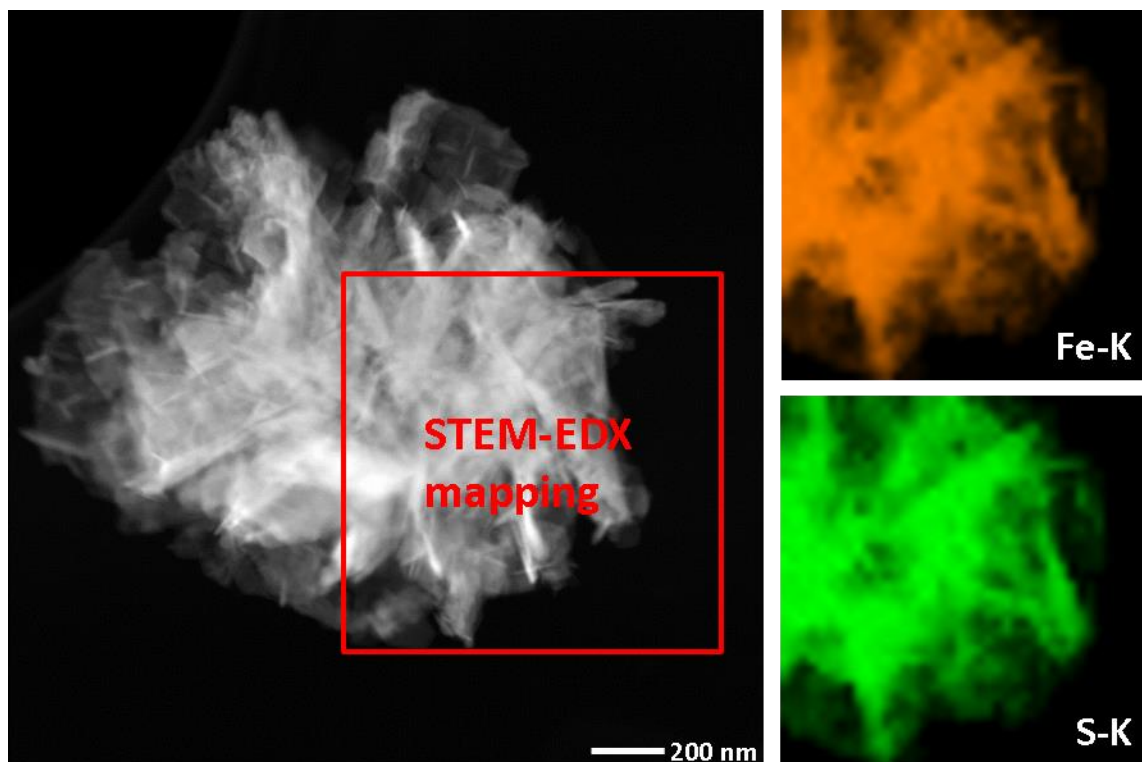

**Fig. S4** STEM-EDX mapping at Fe-K and S-K edges with 40 – 50 at.% Fe and 50 – 60 at.% S content.

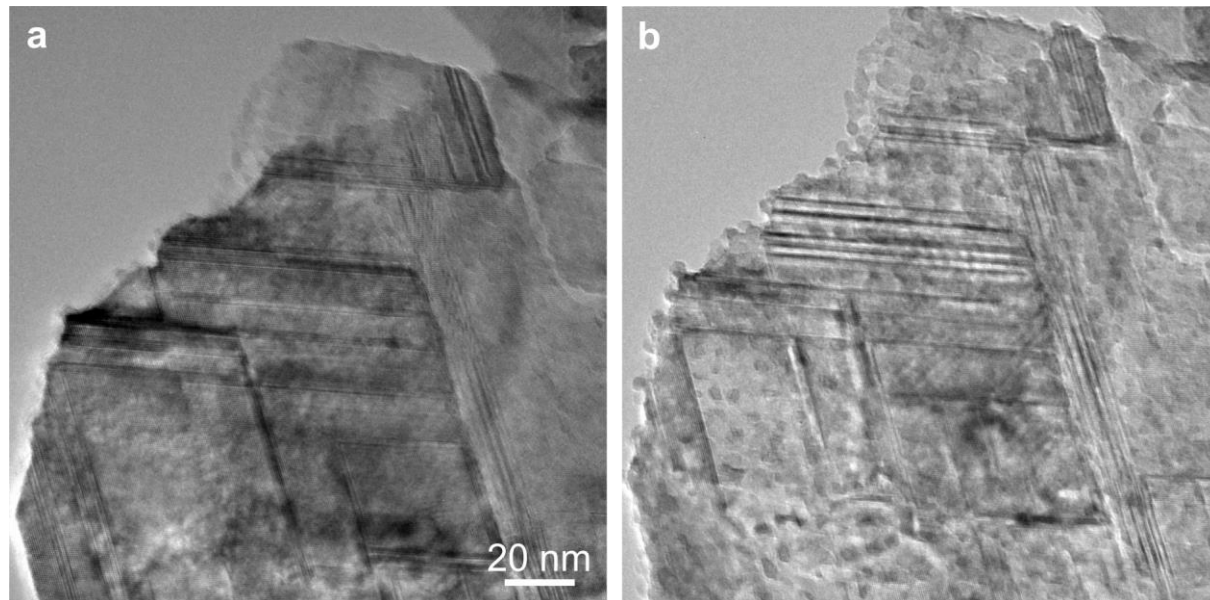

**Fig. S5** HRTEM micrographs of pristine Fe<sub>3</sub>S<sub>4</sub> in zone axis  $[\bar{1}10]$  with prominent stacking faults. a) Before and b) after prolonged exposure to electron beam irradiation.

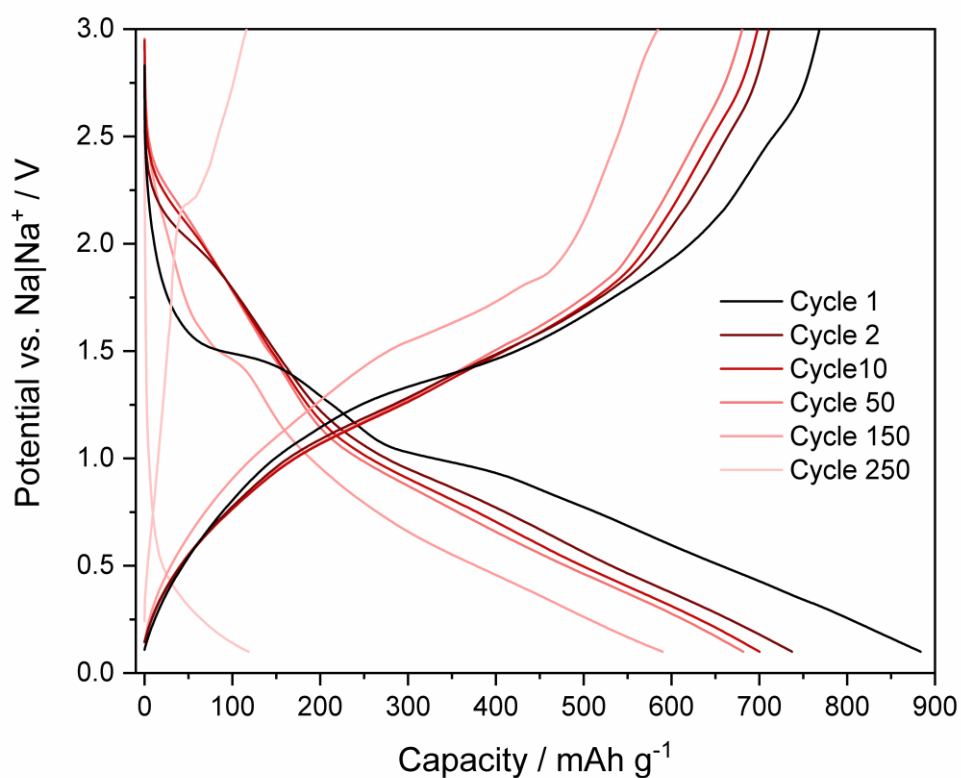

**Fig. S6** GDC profiles at a current density of 0.1 A g<sup>-1</sup> for the first and 0.5 A g<sup>-1</sup> for subsequent cycles in the potential window 3.0 – 0.1 V.

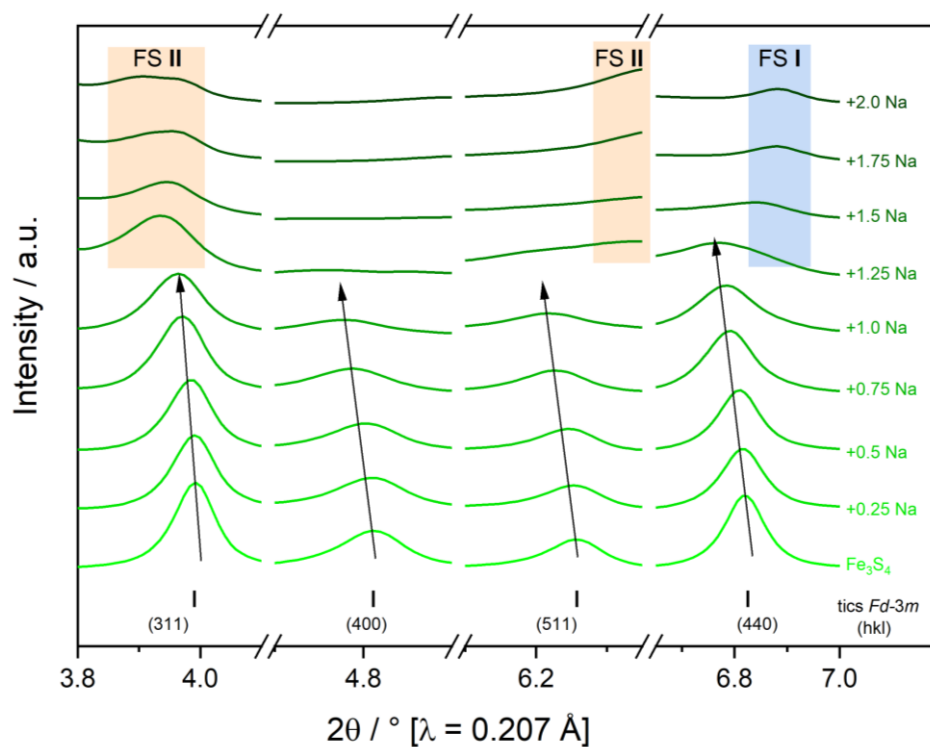

**Fig. S7** Evolution of selected Fe<sub>3</sub>S<sub>4</sub> XRD reflections during initial Na uptake.

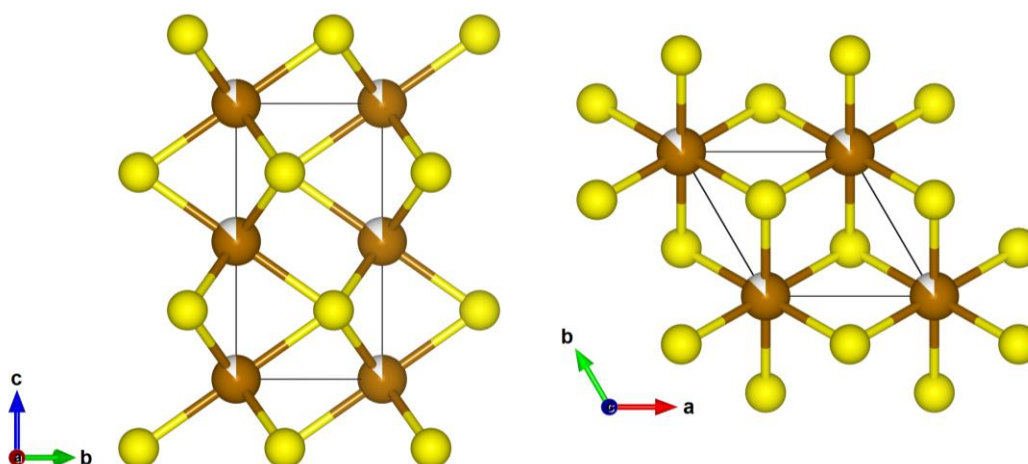

**Fig. S8** Structure of  $\text{Fe}_{0.88}\text{S}$  (pyrrhotite, SG:  $P6_3/mmc$ ) along  $[100]$  (left) and  $[001]$  (right); Brown: Fe, yellow: S.

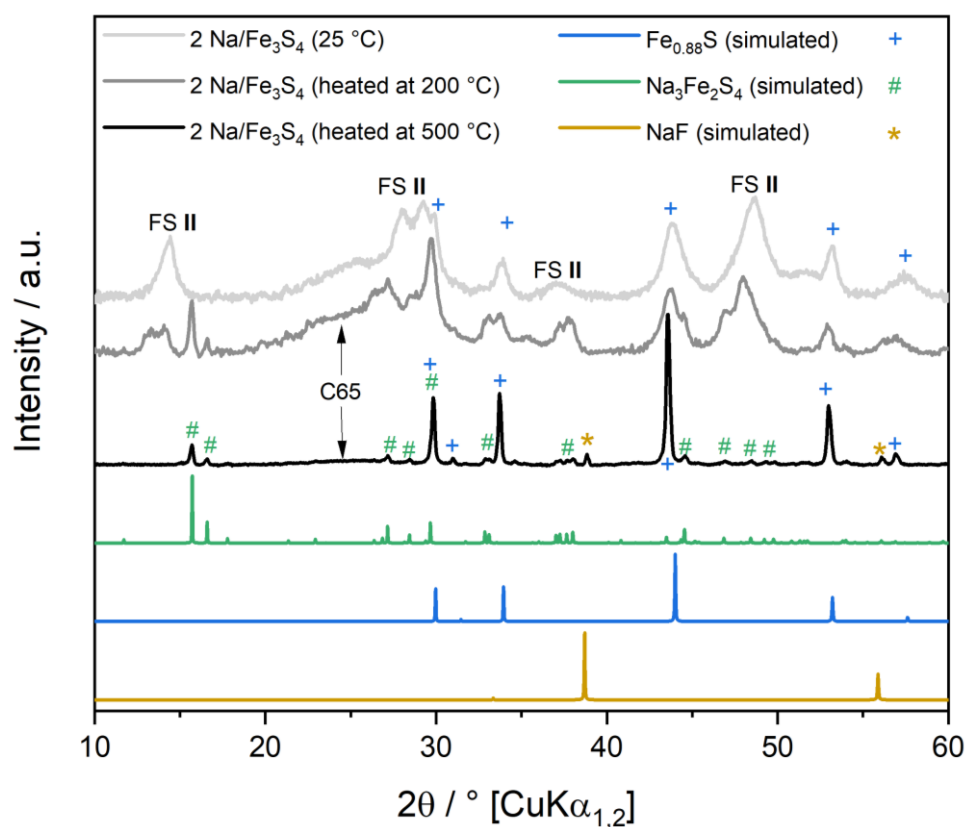

**Fig. S9** Background-subtracted PXRD patterns of heat-treated (200 and 500 °C) samples containing 2  $\text{Na}/\text{Fe}_3\text{S}_4$  compared to simulated patterns for NaF,  $\text{Na}_3\text{Fe}_2\text{S}_4$  and  $\text{Fe}_{0.88}\text{S}$ .



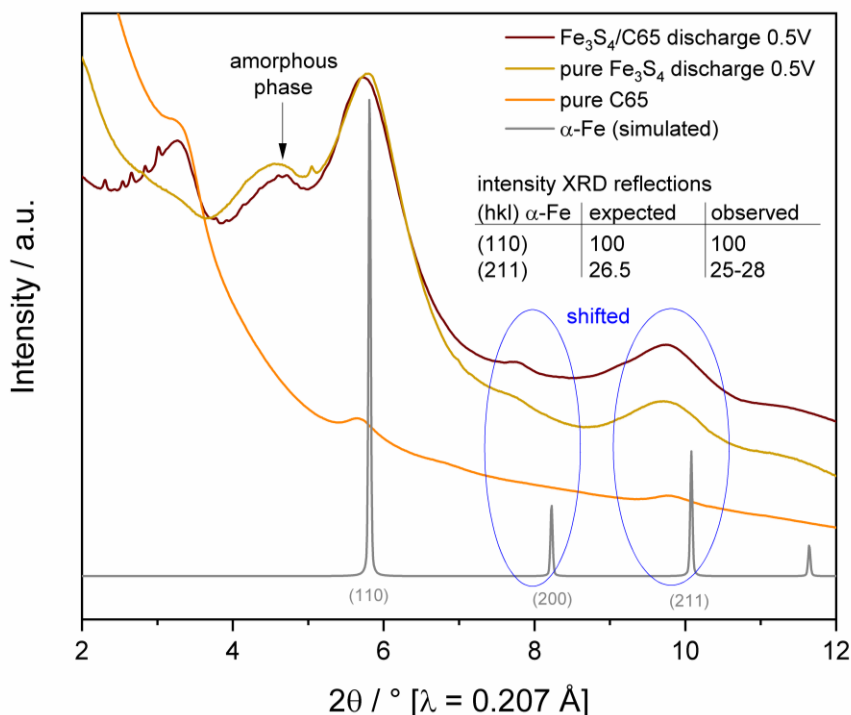

**Fig. S10** Comparison of PXR D patterns collected for samples containing 70 wt.%  $\text{Fe}_3\text{S}_4$  and 30 wt.% carbon C65 (brown) and pure  $\text{Fe}_3\text{S}_4$  (yellow), both discharged to 0.5 V vs.  $\text{Na}|\text{Na}^+$ , pure carbon C65 (orange) and a simulated one for  $\alpha$ -Fe (gray). The table shows expected and observed intensities for  $\alpha$ -Fe.

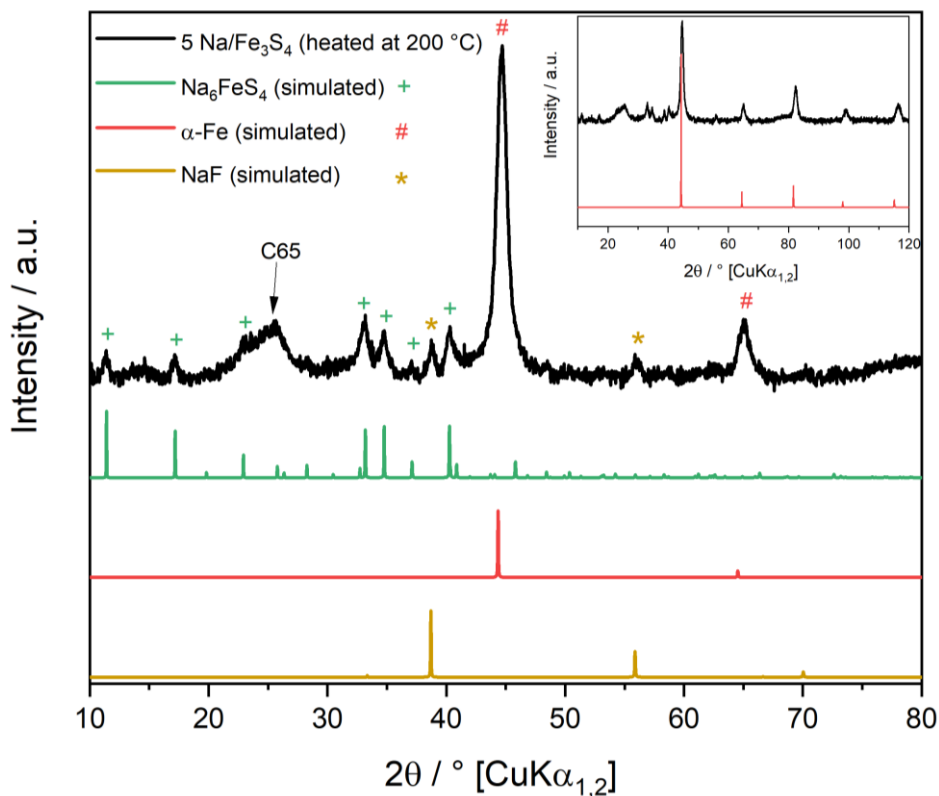

**Fig. S11** Background-subtracted PXR D patterns of a heat-treated (200 °C) sample containing 5  $\text{Na}/\text{Fe}_3\text{S}_4$  compared to simulated patterns for  $\text{NaF}$ ,  $\text{Na}_6\text{FeS}_4$  and  $\alpha$ -Fe. The inset shows the same PXR D pattern to 120°  $2\theta$  with observed reflections clearly matching those of  $\alpha$ -Fe.

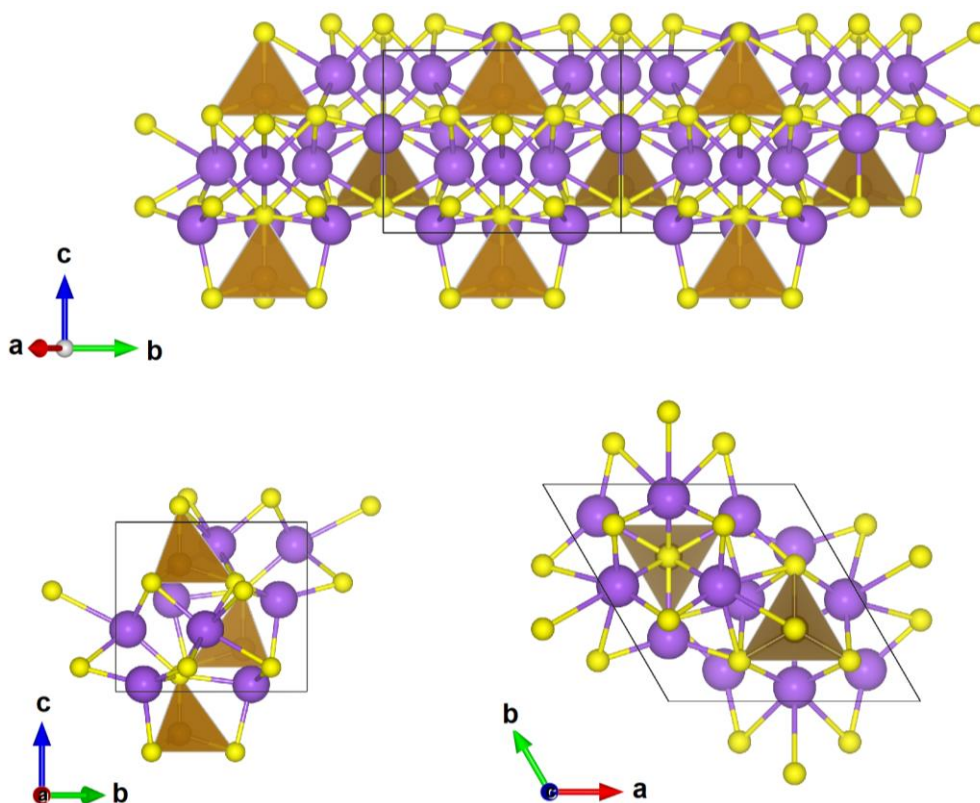

**Fig. S12** Structure of  $\text{Na}_6\text{FeS}_4$  (SG:  $P6_3mc$ ): Brown tetrahedra represent single  $\text{FeS}_4$  units,  $\text{NaS}_4$  tetrahedra and  $\text{NaS}_6$  octahedra are not shown;<sup>1</sup> Brown: Fe, purple: Na, yellow: S.

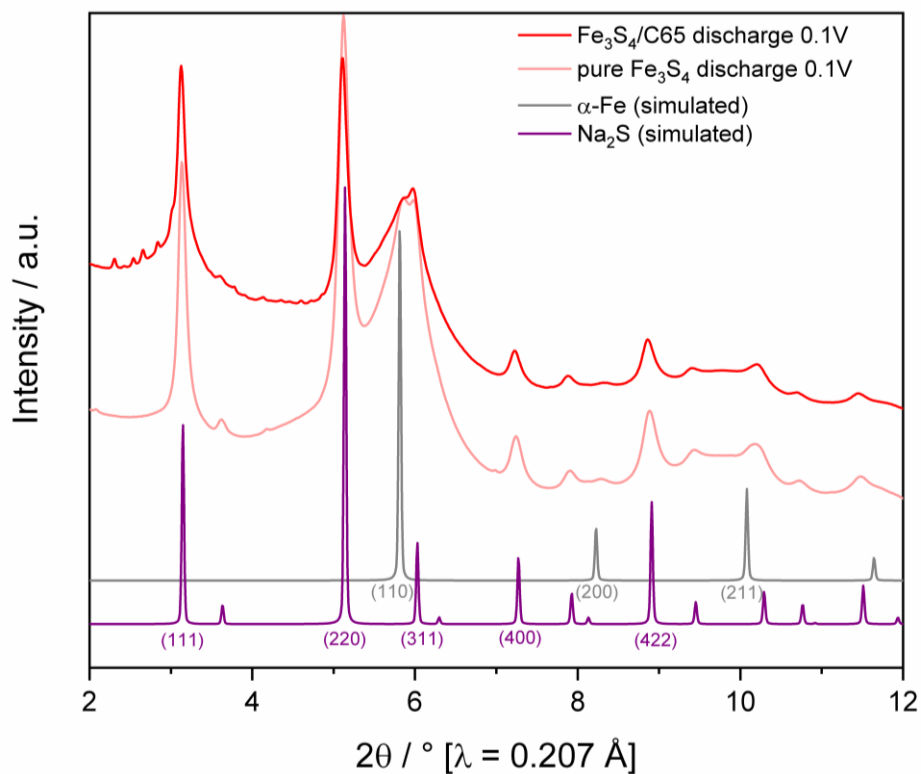

**Fig. S13** Comparison of PXRD patterns collected for samples containing 70 wt.%  $\text{Fe}_3\text{S}_4$  and 30 wt.% carbon C65 (red) and pure  $\text{Fe}_3\text{S}_4$  (light red), both discharged to 0.1 V vs.  $\text{Na}|\text{Na}^+$ , and simulated ones for  $\alpha\text{-Fe}$  (gray) and  $\text{Na}_2\text{S}$  (purple).



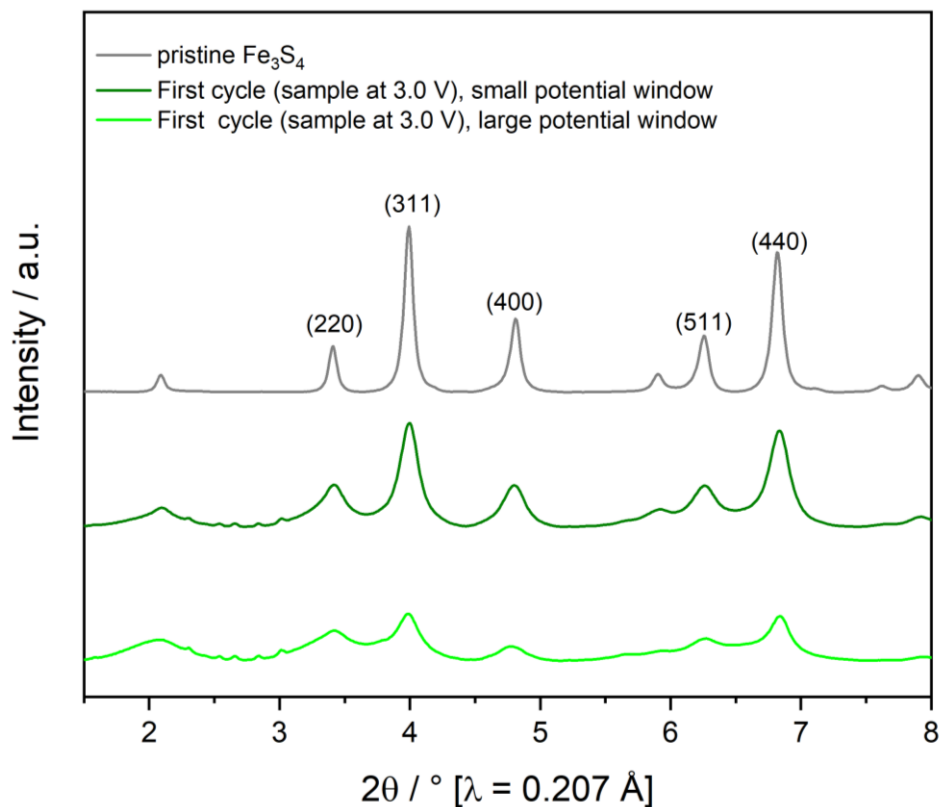

**Fig. S14** PXRDR patterns of pristine  $\text{Fe}_3\text{S}_4$  (gray), after the first cycle in 3.0 – 0.5 V (dark green) and in 3.0 – 0.1 V (light green).

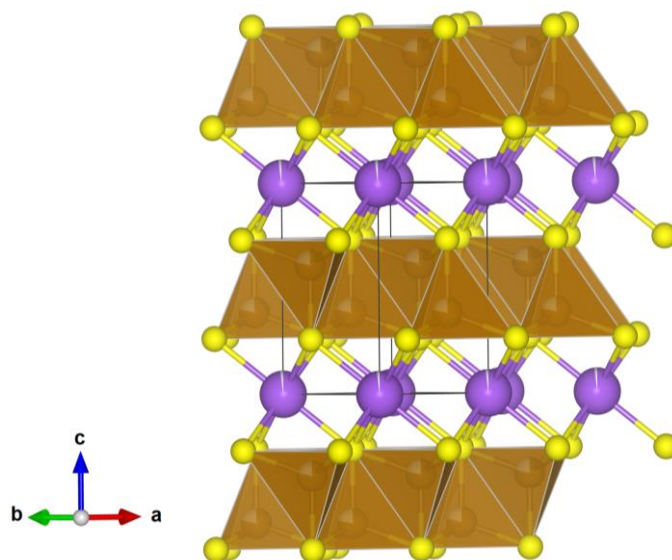

**Fig. S15** Structure of  $\text{NaFe}_{1.6}\text{S}_2$  (SG:  $P\bar{3}m1$ ): Brown polyeder represent edge-sharing  $\text{FeS}_4$  tetrahedra, which form  $[\text{Fe}_{1.6}\text{S}_2]^-$  layers in the  $a/b$  plane hosting  $\text{Na}^+$  ions (purple) on octahedral interlayer sites;<sup>2</sup> Brown: Fe, purple: Na, yellow: S.

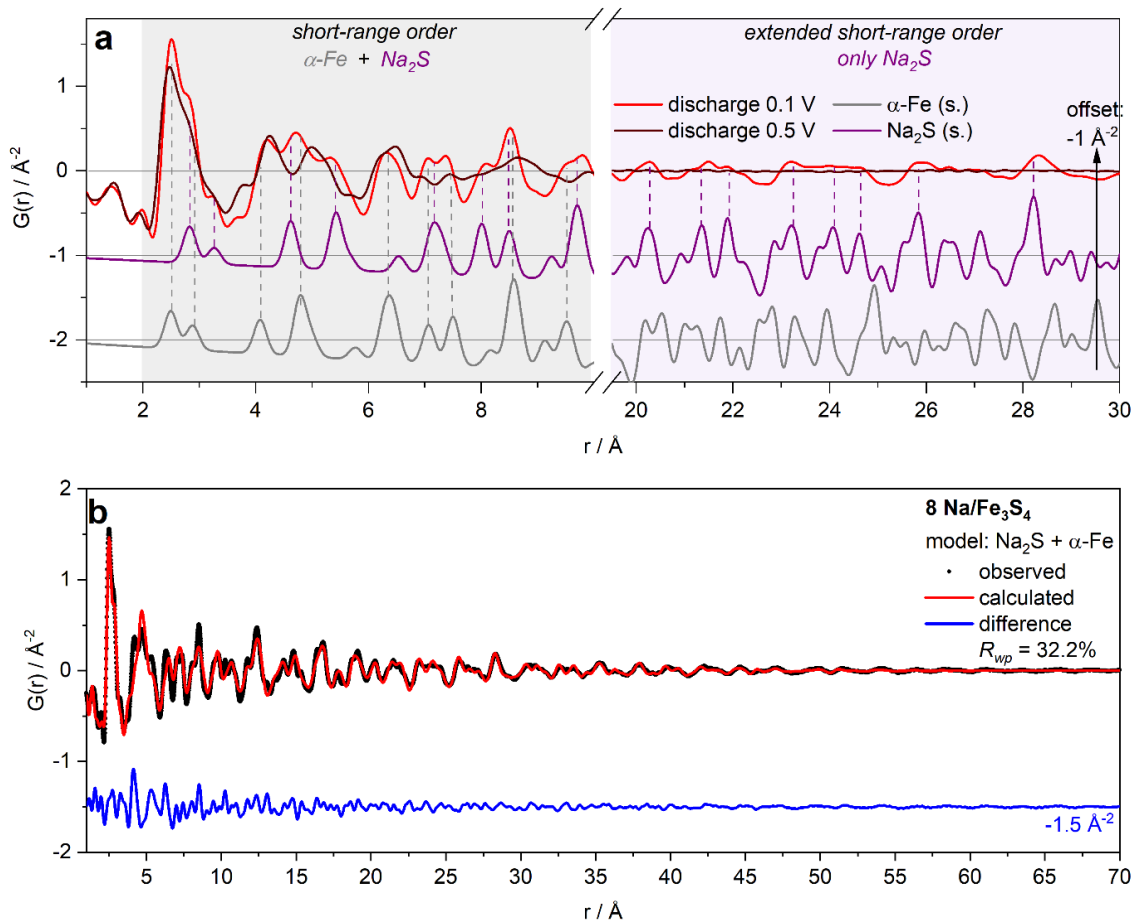

**Fig. S16** a) Comparison of PDFs calculated for samples discharged to 0.5 and 0.1 V, respectively, to simulated PDFs for  $\alpha\text{-Fe}$  and  $\text{Na}_2\text{S}$  with spherical shapes ( $D_{sph} = 20 \text{ nm}$ ); b) Modelling of the PDF of the sample discharged to 0.1 V ( $8 \text{ Na/Fe}_3\text{S}_4$ ) to  $\alpha\text{-Fe}$  and  $\text{Na}_2\text{S}$ .

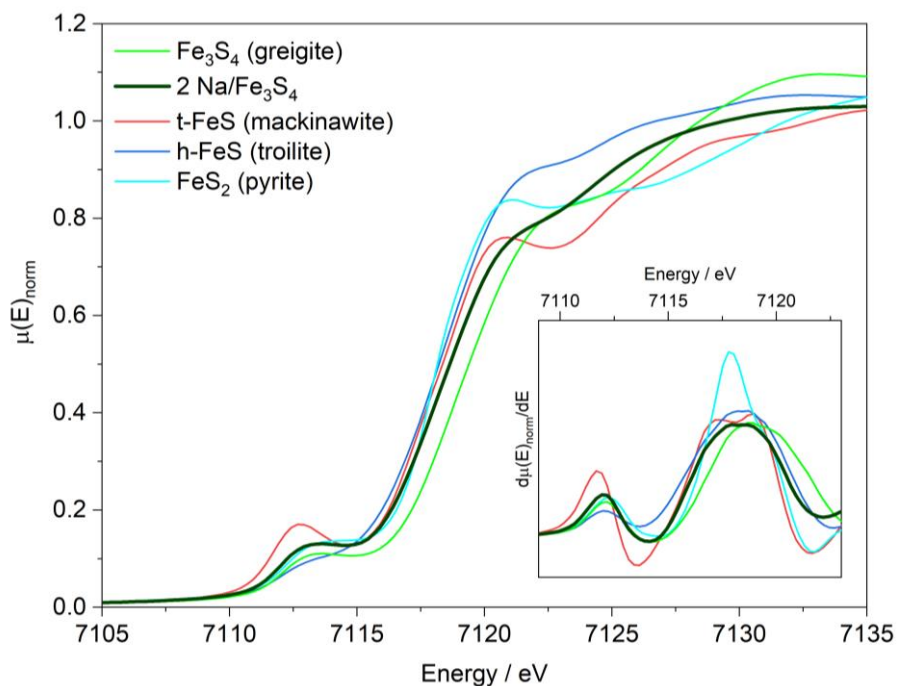

**Fig. S17** XANES spectra of a sample containing  $2 \text{ Na/Fe}_3\text{S}_4$  compared to reference spectra of t-FeS (mackinawite), h-FeS (troilite),  $\text{FeS}_2$  (pyrite) and  $\text{Fe}_3\text{S}_4$  (greigite). The inset shows corresponding deviations  $d\mu(E)_{\text{norm}}/dE$ .

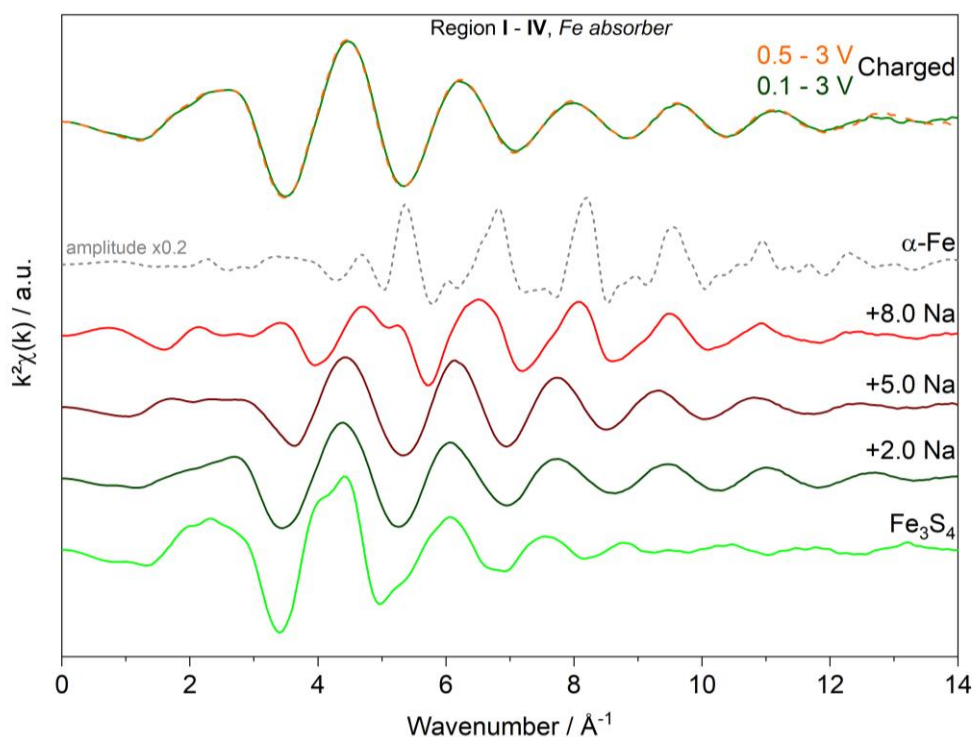

**Fig. S18** Evolution of  $k$  space EXAFS spectra (Fe absorber) during Na uptake/release in  $\text{Fe}_3\text{S}_4$ .

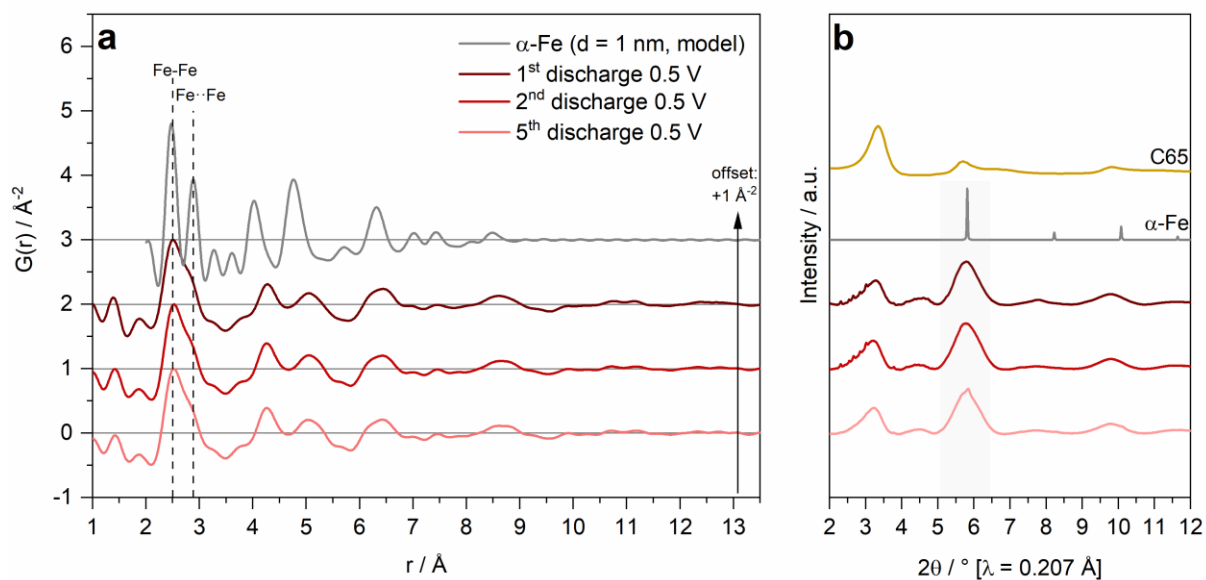

**Fig. S19** a) PDFs calculated for discharged samples (0.5 V) in the first, second and fifth cycle applying the small potential window and b) corresponding PXR patterns compared to one for carbon C65 and a simulated one for  $\alpha\text{-Fe}$ .

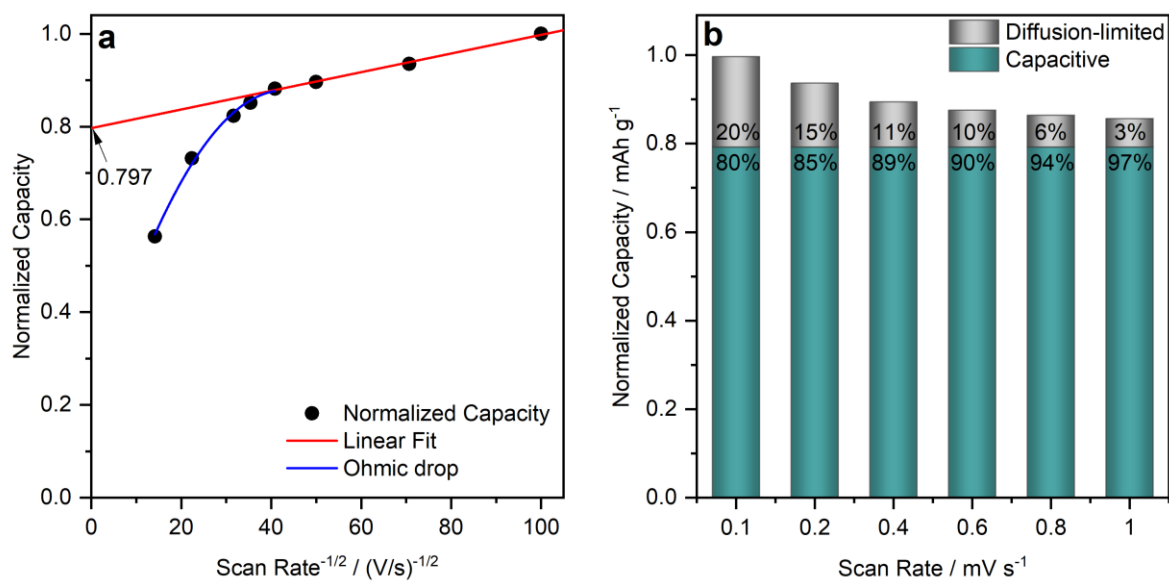

**Fig. S20** a) Infinite scan rate extrapolation (Trasatti method)<sup>3–5</sup> for small scan rates where the Ohmic drop is neglectable and b) quantities extracted from this method.

### References in Supplementary Information

- 1 W. Bronger, H. Balk-Hardtdegen and U. Ruschewitz, *Z. Anorg. Allg. Chem.*, 1992, **616**, 14–18.
- 2 X. Lai, X. Chen, S. Jin, G. Wang, T. Zhou, T. Ying, H. Zhang, S. Shen and W. Wang, *Inorg. Chem.*, 2013, **52**, 12860–12862.
- 3 S. Ardizzone, G. Fregonara and S. Trasatti, *Electrochim. Acta*, 1990, **35**, 263–267.
- 4 G. Zou, Q. Zhang, C. Fernandez, G. Huang, J. Huang and Q. Peng, *ACS Nano*, 2017, **11**, 12219–12229.
- 5 V. Augustyn, J. Come, M. A. Lowe, J. W. Kim, P.-L. Taberna, S. H. Tolbert, H. D. Abruña, P. Simon and B. Dunn, *Nat. Mater.*, 2013, **12**, 518–522.
